# Supplementary material for: Engineering the epoxide hydrolase from Agromyces mediolanus for enhanced enantioselectivity and activity in the kinetic resolution of racemic epichlorohydrin
Source: Royal Society of Chemistry journal article supplement (doi:10.1039/c5ra02492g), 2015-01-01
Supplement: c5ra02492g1.pdf [file c5ra02492g1.pdf]

**Title:** Engineering the epoxide hydrolase from *Agromyces mediolanus* for enhanced enantioselectivity and activity in the kinetic resolution of racemic epichlorohydrin

**Authors:** Feng Xue<sup>a,b</sup>, Zhi-Qiang Liu<sup>a,b</sup>, Nan-Wei Wan<sup>a,b</sup>, Hang-Qin Zhu<sup>a,b</sup>, Yu-Guo Zheng<sup>a,b\*</sup>

<sup>a</sup>Institute of Bioengineering, Zhejiang University of Technology, Hangzhou, Zhejiang 310014, P. R. China;

<sup>b</sup>Engineering Research Center of Bioconversion and Biopurification of the Ministry of Education, Zhejiang University of Technology, Hangzhou 310014, P. R. China

**Corresponding author:**

Yuguo Zheng

E-mail address: zhengyg@zjut.edu.cn;

Tel.: +86-571-88320630;

Fax: +86-571-88320630

---

## 1. Materials and methods

### 1.1 Isolation and identification of (*S*)-ECH

The synthesized (*S*)-ECH was extracted twice with the equal volume of diethylether, dried with anhydrous sodium sulfate. A reduced pressure distillation was used to recover the diethylether at 40 °C.

Then a pure (*S*)-ECH (>99%) was gained after the reduced pressure distillation at 80 °C.

Identification of (*S*)-ECH was performed by <sup>1</sup>H NMR and <sup>13</sup>C NMR spectrometry (Bruker 500-MHz NMR spectrometer, Switzerland, 1% (*S*)-ECH in CD<sub>3</sub>OD) and gas chromatography mass spectra (Agilent 7890A/5970N GC-MS system).

Table S1 Oligonucleotide sequences used in this study

| Primer  | Oligonucleotide sequences (5'-3') |
|---------|-----------------------------------|
| EN240NF | AGGGTGCGTATNNNAGTCTGCAGTCGACGAAG  |
| EN240NR | ACTGCAGACTNNNATACGCACCCTCGCGC     |
| ER338NF | CCGCCGAAATTNNNCGACCGCCGGCCGAG     |
| ER338NR | CCGGCGGTCGNNNAATTCGGCGGGGAATCG    |
| ER313NF | CCGAACGAGCGNNNGAAGGGTGGACTTTTCCTC |
| ER313NR | AGTCCACCCTTCNNNCGCTCGTTCGGCGTAC   |
| ES233NF | AACCAGGAATGGNNNGCGCGCGAGGGTGCG    |
| ES233NR | CCCTCGCGCGCNNNCCATTCTGGTTCGCAC    |
| ES207NF | TTAACTACAGCNNNGTACAGCCCAGCATGATC  |
| ES207NR | TGGGCTGTACNNNGCTGTAGTTAAGGTGCAG   |
| EF318NF | AAGGGTGGACTNNNCCTCCGGGCGAGATC     |
| EF318NR | GCCCGGAGGNNNAGTCCACCCTTCCCGC      |
| EW182NF | AGGGCGGCGACNNNGTTCTACCGTCCTCACC   |
| EW182NR | ACGGTAGAACCNNNGTTCGCCGCCCTGCC     |
| EW182FF | AGGGCGGCGACTTTGGTTCTACCGTCCTCACC  |
| EW182FR | ACGGTAGAACC AAAGTCGCCGCCCTGCC     |
| EN240Df | AGGGTGCGTATGACAGTCTGCAGTCGACG     |
| EN240Dr | ACTGCAGACTGTCATACGCACCCTCGCG      |

N stands for A, T, G or C

Table S2 Results of docking experiments

| mutant | $d_{R-ECH}$ <sup>a</sup> | $d_{S-ECH}$ | $\alpha_{1R}$ [deg] <sup>b</sup> | $\alpha_{2R}$ [deg] <sup>b</sup> | $\alpha_{1S}$ [deg] <sup>b</sup> | $\alpha_{2S}$ [deg] <sup>b</sup> | Reference  |
|--------|--------------------------|-------------|----------------------------------|----------------------------------|----------------------------------|----------------------------------|------------|
| WT     | 3.5                      | 3.8         | 125.0                            | 118.8                            | 94.3                             | 88.3                             | 1          |
| N240D  | 3.2                      | 3.9         | 121.0                            | 118.3                            | 69.9                             | 63.9                             | This study |
| VD     | 3.2                      | 4.1         | 137.9                            | 112.7                            | 82.9                             | 62.8                             | This study |
| VDF    | 3.3                      | 4.4         | 142.0                            | 136.8                            | 55.2                             | 64.7                             | This study |

<sup>a</sup>  $d$ , the distance between the Asp181 oxygen and the attacked epoxide carbon;

<sup>b</sup>  $\alpha_1$ , the angle from Asp181 oxygen *via* the attacked epoxide carbon to the epoxide oxygen;  $\alpha_2$ , the angle Asp181 oxygen *via* the attacked epoxide carbon to the other epoxide carbon.

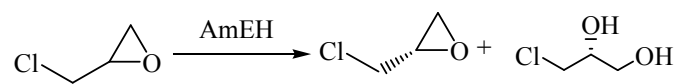

(*R,S*)-epichlorohydrin (*S*)-epichlorohydrin (*R*)-3-chloro-1,2-propanediol

Fig S1 Synthesis of (*S*)-epichlorohydrin by epoxide hydrolase from *Agromyces mediolanus* ZJB120203

(AmEH).

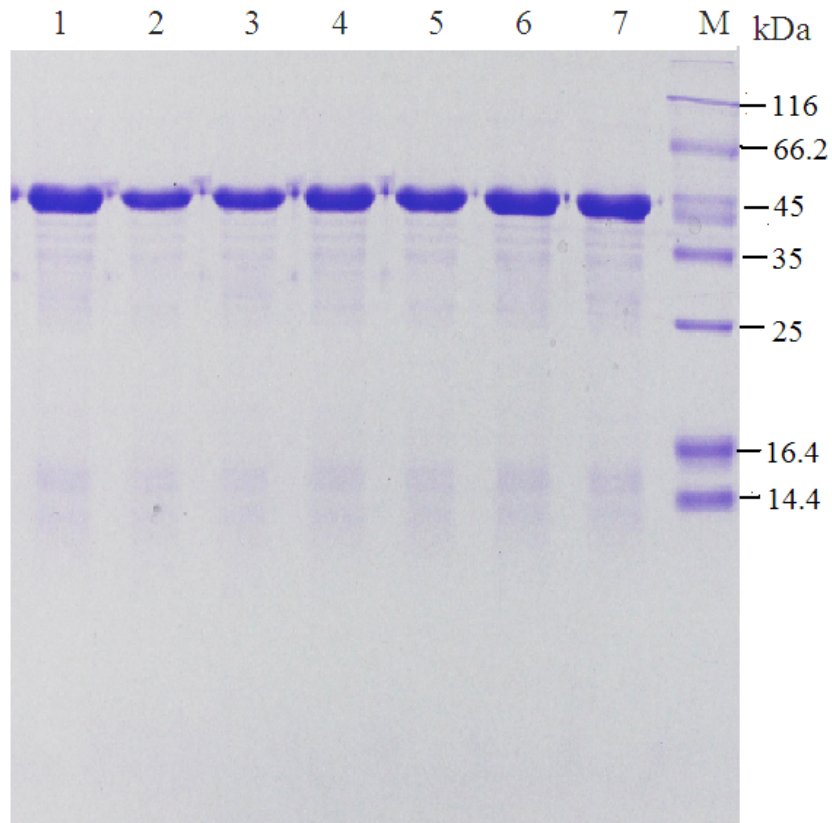

Fig. S2 SDS-PAGE analysis of the purified wild-type AmEH and its variants. Lane 1: the purified wild-type AmEH; Lane 2: the purified variant W182F; Lane 3: the purified variant S207V; Lane 4: the purified variant N240D; Lane 5: the purified variant W182F/S207V; Lane 6: the purified variant VD; Lane 7: the purified variant VDF; Lane M: protein marker.

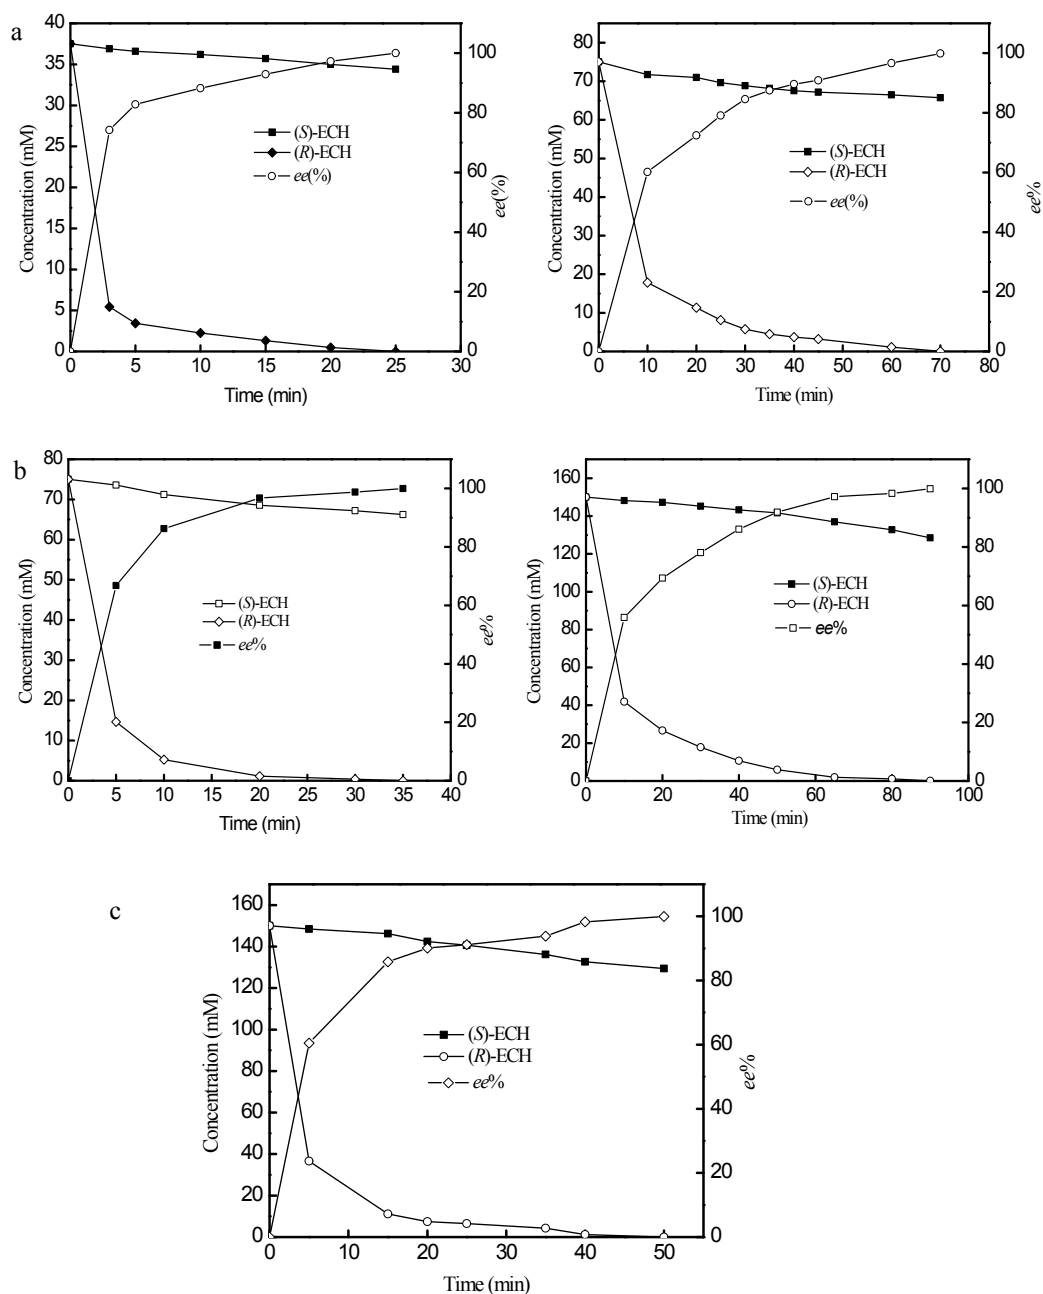

Fig. S3 Enantioselective hydrolysis of racemic ECH by the recombinant *E. coli* variant VDF. The reaction was performed at 30 °C in 200 mM sodium phosphate buffer (pH 8.0), 75-300 mM ECH and 4.5-13.5 g dcw/L recombinant *E. coli*. Samples were removed at time intervals, the ECH concentration and the optical purity of the (*S*)-ECH were determined by chiral GC.

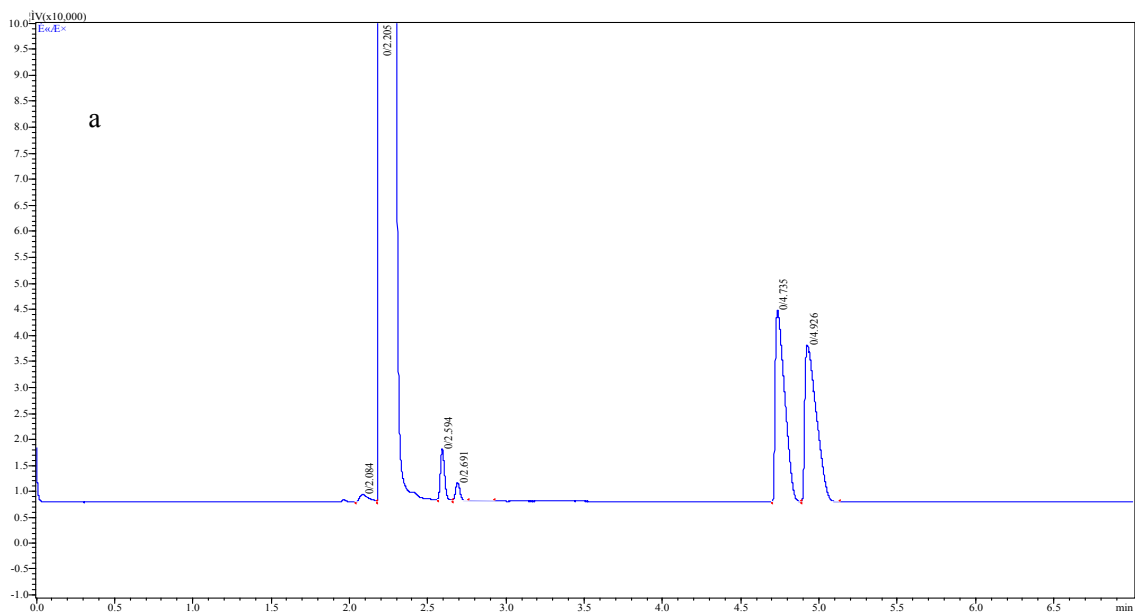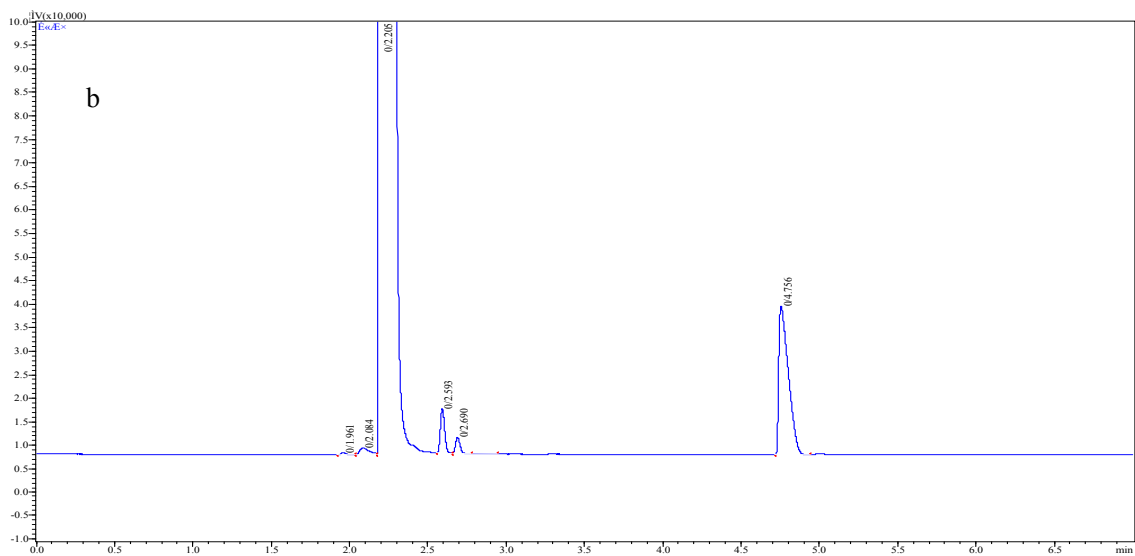

Fig. S4. Estimation of optical purity of (S)-ECH by gas chromatography. Samples: a (R,S)-ECH, b (S)-ECH.



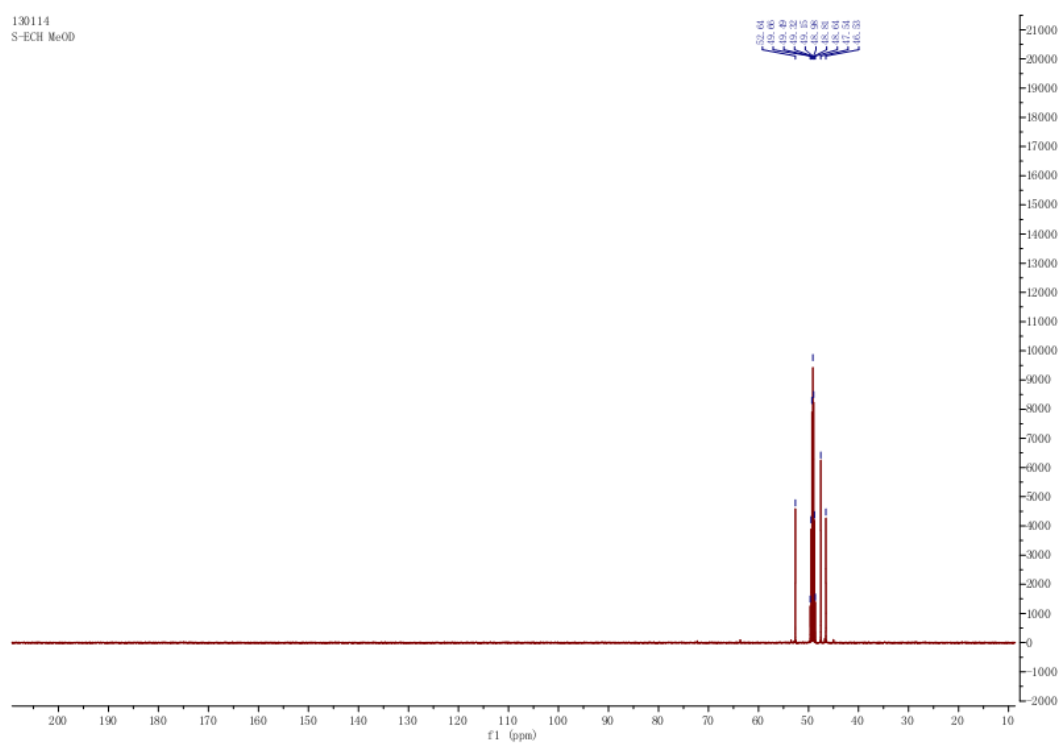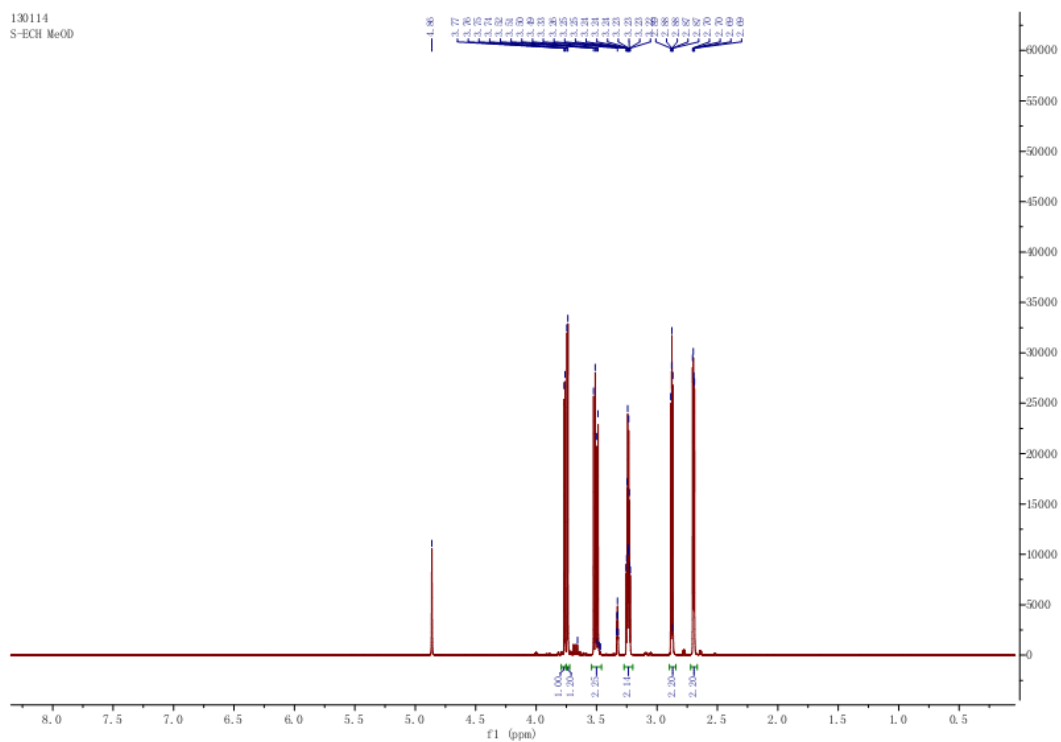

Fig. S5.  $^{13}\text{C}$ -NMR(a) and  $^1\text{H}$ -NMR(b) spectra of (*S*)-ECH.

---

Unknown: S-ECH 68 (2.898) Cm (65:72-(44:52+91:99))  
Compound in Library Factor = 299

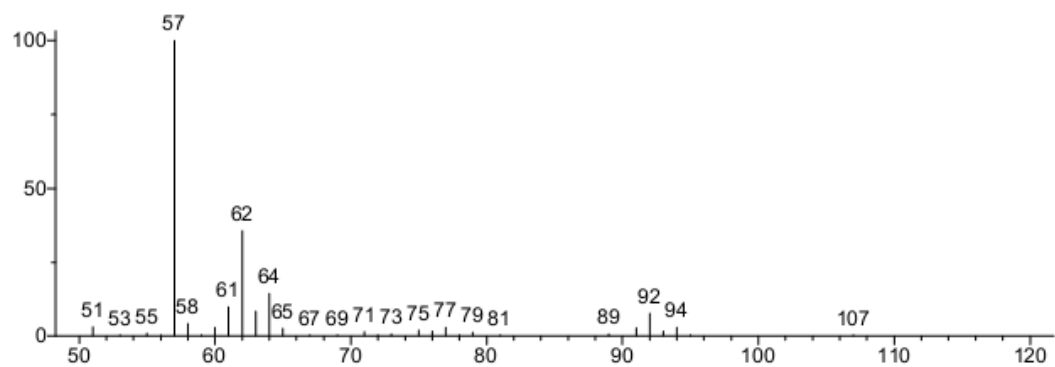

Fig. S6. Mass spectroscopy chromatogram of of (S)-ECH.

## References

1. F. Xue, Z. Q. Liu, S. P. Zou, N. W. Wan, W. Y. Zhu, Q. Zhu and Y. G. Zheng, *Process Biochemistry*, 2014, **49**, 409-417.
